# Supplementary material for: Optimization of dialdehyde soluble soybean polysaccharide: preparation by response surface methodology for cleaner leather tanning
Source: Royal Society of Chemistry journal article supplement (doi:10.1039/d2ra00222a), 2022-01-01
Supplement: d2ra00222a1.pdf [file d2ra00222a1.pdf]

## Supplementary data

### Preparation Optimization of Dialdehyde Soybean Polysaccharide by Response Surface Methodology for Cleaner Leather Tanning

Haolin Zhu <sup>a</sup>, Hui Liu <sup>a,b</sup>, Keyong Tang <sup>a,\*</sup>, Jie Liu <sup>a</sup>, Xuejing Zheng <sup>a</sup>, Ying Pei <sup>a</sup>,  
Jide Zhong <sup>c</sup>

<sup>a</sup> School of Materials Science and Engineering, Zhengzhou University, Zhengzhou, 450001, PR  
China

<sup>b</sup> Department of Packaging Engineering, Henan University of Science and Technology, Luoyang  
471023, PR China China

<sup>c</sup> Henan Prosper Skins & Leather Enterprise Co., Ltd, Mengzhou 454750, PR China

\* Corresponding authors. E-mail addresses: kytangzzu@hotmail.com

It was fatliquored according to the processes shown in Table S1

**Table S1.** Fatliquoring processes

| Process        | Chemicals                         | Quantity/% | Duration/min | Temperature/°C | pH  |
|----------------|-----------------------------------|------------|--------------|----------------|-----|
| Neutralization | Water                             | 200        |              | 30             |     |
|                | Neutralizing agent <sup>[a]</sup> |            | 120          |                | 6   |
| Fatliquoring   | Water                             | 200        |              | 50             |     |
|                | Fatliquor                         | 10         | 120          |                |     |
| Washing        | Formic acid                       |            | 60           |                | 3.8 |
|                | Water                             | 800        | 10           | 25             |     |

<sup>[a]</sup> Sodium bicarbonate (10%) for traditional chrome tanning; formic acid (1%) for DPA tanning.

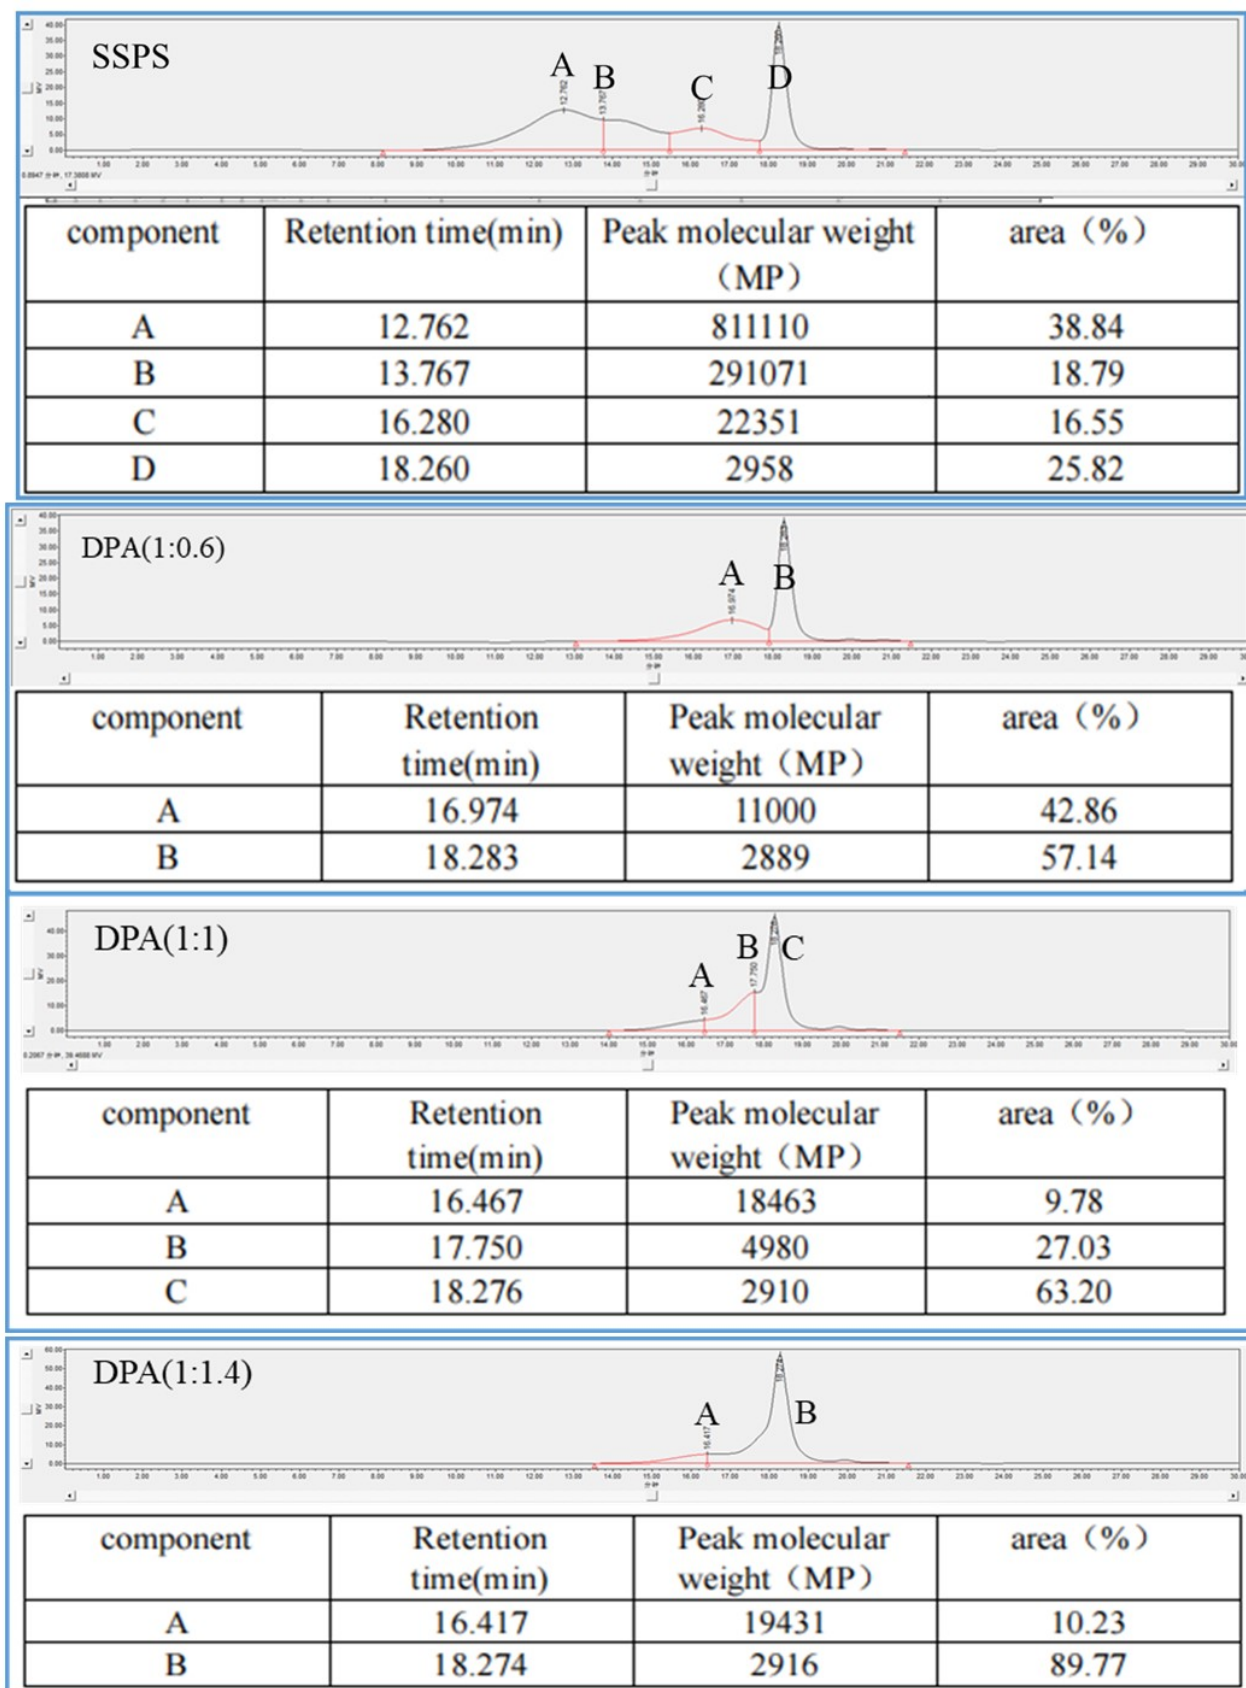

Fig. S1. GPC diagram and peak molecular weight of SSPS and different DPAs.
